# Supplementary material for: Galectin 3 protects from cisplatin-induced acute kidney injury by promoting TLR-2-dependent activation of IDO1/Kynurenine pathway in renal DCs
Source: PubMed Central journal article supplement (PMC6735380; doi:10.7150/thno.33959), 2019-08-14

# **Galectin 3 protects from cisplatin-induced acute kidney injury by promoting TLR-2-dependent activation of IDO1/Kynurenine pathway in renal DCs**

Vladislav Volarevic<sup>1\*</sup>, Bojana Simovic Markovic<sup>1</sup>, Marina Gazdic Jankovic<sup>2</sup>, Bojana Djokovic<sup>1</sup>, Nemanja Jovicic<sup>3</sup>, C. Randall Harrell<sup>4</sup>, Crissy Fellabaum<sup>4</sup>, Valentin Djonov<sup>5</sup>, Nebojsa Arsenijevic<sup>1</sup>, and Miodrag L. Lukic<sup>1</sup>

<sup>1</sup>Department of Microbiology and Immunology, Center for Molecular Medicine and Stem Cell Research, Faculty of Medical Sciences, University of Kragujevac, 69 Svetozar Markovic Street, Kragujevac, Serbia

<sup>2</sup>Department of Genetics, Faculty of Medical Sciences, University of Kragujevac, 69 Svetozar Markovic Street, Kragujevac, Serbia

<sup>3</sup>Department of Histology and Embryology, Faculty of Medical Sciences, University of Kragujevac, 69 Svetozar Markovic Street, Kragujevac, Serbia

<sup>4</sup>Regenerative Processing Plant, LLC, 34176 US Highway 19 N Palm Harbor, Palm Harbor, Florida, United States of America

<sup>5</sup>Institute of Anatomy, University of Bern, 2 Baltzerstrasse, Switzerland

\*Corresponding author: Prof. dr. Vladislav Volarevic

Postal address: 69 Svetozar Markovic Street, 34000 Kragujevac, Serbia

e-mail: [drvolarevic@yahoo.com](mailto:drvolarevic@yahoo.com)

telephone number/fax number: +38134306800

## Supplementary figure legends

**Supplementary Figure 1. Davanat significantly attenuated expression of Gal-3 in the kidneys.** Davanat was intraperitoneally injected in CDDP-treated WT animals (100 µg/day), for three consecutive days before CDDP administration (16 mg/kg body weight). Representative immunohistochemical images of renal tissue sections showing expression of Gal-3 in the cortex of saline-only, saline+Davanat, CDDP-only and CDDP+Davanat-treated kidneys (left panel). Bar graphs showing significantly attenuated expression of Gal-3 in the kidneys of saline+Davanat ( $p < 0.01$ ) and CDDP+Davanat-treated mice ( $p < 0.001$ ) compared to saline-only and CDDP-only-treated animals, respectively (right panel). Values are Mean  $\pm$  standard error of the mean (SEM) ( $n = 6$  mice per group). \*\* $p < 0.001$ , \*\*\* $p < 0.0001$ .

**Supplementary Figure 2. Gal-3 deletion did not affect nephroprotective and immunosuppressive capacity of TLR-2-primed macrophages in CDDP-induced AKI.** Macrophages, isolated from healthy WT and Gal-3<sup>-/-</sup> mice, were stimulated with Pam3CSK4 (300 ng/mL; WT $\phi^{Pam3CSK4}$  and Gal-3<sup>-/-</sup> $\phi^{Pam3CSK4}$ ) and injected via the tail vein ( $1 \times 10^6$ /mouse) 2 h before administration of CDDP (16 mg/kg body weight). There was no significant difference in serum levels of urea and creatinine (A), histological score (B) and the extent of renal injury, observed in cortex of CDDP-treated kidneys of mice that received WT $\phi^{Pam3CSK4}$  and Gal-3<sup>-/-</sup> $\phi^{Pam3CSK4}$ . Data from two individual experiments with 8 mice per group are shown as Mean  $\pm$  SEM.

**Supplementary Figure 3. Representative density plots showing neutrophils and CD4+ T cells which infiltrated kidneys of CDDP-treated WT mice that received WT Tregs and Gal-3<sup>-/-</sup>Tregs.** WT Tregs and Gal-3<sup>-/-</sup>Tregs ( $1 \times 10^6$  Tregs/ mouse) were intravenously injected in

CDDP-treated WT animals 18 h before induction of AKI. Representative density plots showing IFN- $\gamma$  and IL-17-producing cells gated in the population of Gr-1+CD45+ neutrophils (A) and IFN- $\gamma$ , IL-17-producing and FoxP3-expressing cells gated in the population of CD4+ T cells (B).

**Supplementary Figure 4. Representative density plots showing Tregs before and after culture with WTDCs<sup>Pam3CSK4</sup>, WTDC<sup>Pam3CSK4+Davanat</sup> or Gal-3<sup>-/-</sup>DCs<sup>Pam3CSK4</sup>.** Tregs and DCs were cultured physically separated using a 0.4  $\mu$ m porous transwell system. After 48 h of culture, non-primed Tregs or Tregs primed with WTDCs<sup>Pam3CSK4</sup>, WTDC<sup>Pam3CSK4+Davanat</sup> or Gal-3<sup>-/-</sup>DCs<sup>Pam3CSK4</sup> were collected and used for intracellular staining and flow cytometry analysis. IFN- $\gamma$ , IL-17, and IL-10-producing cells gated in the population of FoxP3-expressing cells which were previously gated in the population of CD4+CD25+cells.

**Supplementary Figure 5. Transfer of WTDCs<sup>Pam3CSK4</sup> significantly attenuated CDDP-induced AKI in WT recipients by altering cytokine production in renal-infiltrated CD4+T cells and neutrophils.** TLR-2-primed DCs, isolated from the kidneys of untreated WT and Gal-3<sup>-/-</sup> mice (WTDCs<sup>Pam3CSK4</sup> and Gal-3<sup>-/-</sup>DCs<sup>Pam3CSK4</sup>), were intravenously injected ( $5 \times 10^5$  cells/mouse) in CDDP-treated WT recipients (WT<sup>WTDCsPam3CSK4</sup> and WT<sup>Gal,3<sup>-/-</sup>DCsPam3CSK4</sup>) two days prior CDDP administration (16 mg/kg body weight). IDO1 was inhibited in TLR-2-primed renal DCs (WTDCs<sup>Pam3CSK4+1-MT</sup>) and Gal-3<sup>-/-</sup>DCs (Gal-3<sup>-/-</sup>DCs<sup>Pam3CSK4+1-MT</sup>) by using 1-methyl tryptophan (1-MT; 2 mM). Representative density plots showing IL-10-producing, FoxP3-expressing, IL-17 and IFN- $\gamma$ -producing cells gated in the population of CD4+T cells (A) and IL-10-, IL-17- and IFN- $\gamma$ -producing cells gated in the population of CD45+Gr-1+ neutrophils (B).

**Supplementary Figure 6. Transfer of WTDCs<sup>Pam3CSK4</sup> significantly attenuated CDDP-induced AKI in Gal-3<sup>-/-</sup> recipients by altering cytokine production in renal-infiltrated CD4+T cells and neutrophils.** TLR-2-primed DCs, isolated from the kidneys of untreated WT

and Gal-3<sup>-/-</sup> mice (WTDCs<sup>Pam3CSK4</sup> and Gal-3<sup>-/-</sup>DCs<sup>Pam3CSK4</sup>), were intravenously injected ( $5 \times 10^5$  cells/ mouse) in CDDP-treated Gal-3<sup>-/-</sup> recipients (Gal-3<sup>-/-</sup>WTDCs<sup>Pam3CSK4</sup> and Gal-3<sup>-/-</sup>Gal-3<sup>-/-</sup>DCs<sup>Pam3CSK4</sup>) two days prior CDDP administration (16 mg/kg body weight). IDO1 was inhibited in TLR-2-primed renal DCs (WTDCs<sup>Pam3CSK4+1-MT</sup>) and Gal-3<sup>-/-</sup>DCs (Gal-3<sup>-/-</sup>DCs<sup>Pam3CSK4+1-MT</sup>) by using 1-methyl tryptophan (1-MT; 2 mM). Representative density plots showing IFN- $\gamma$ -, IL-17-, IL-10-producing cells gated in the population of CD45+Gr-1+ neutrophils (A) and IL-17-,IFN- $\gamma$ -producing, FoxP3-expressing and IL-10-producing cells gated in the population of CD4+T cells (B).

**Supplementary Figure 7. Expression of Gal-3 on TLR-2-primed DCs is crucially important for their capacity to enhance Tregs-based modulation of cytokine production in renal-infiltrated neutrophils.** For the depletion of Tregs, anti-CD25 monoclonal antibody (250  $\mu$ g/mouse) was intraperitoneally given to mice 3 days before CDDP administration (16 mg/kg body weight). For transfer experiments non-primed Tregs, Tregs primed with WTDC<sup>Pam3CSK4</sup>, WTDC<sup>Pam3CSK4+Davanat</sup> or Gal-3<sup>-/-</sup> DC<sup>Pam3CSK4</sup> ( $1 \times 10^6$  Tregs/ mouse) were intravenously injected in CDDP-treated animals 18 h before induction of AKI. Representative density plots showing T-bet-expressing, IFN- $\gamma$ -, IL-17-, TNF- $\alpha$ -, IL-10-producing cells gated in the population of CD45+Gr-1+ neutrophils.

**Supplementary Figure 8. Depletion of Tregs completely diminished Gal-3-dependent capacity of TLR-primed renal DCs to suppress production of inflammatory cytokines in neutrophils and CD4+T cells of CDDP-injured kidneys.** For the depletion of Tregs, CDDP-treated WT<sup>WTDCPam3CSK4</sup> and Gal-3<sup>-/-</sup>WTDC<sup>Pam3CSK4</sup> mice received either cyclophosphamide (CY; 10 mg/kg) 3 days before CDDP administration (16 mg/kg body weight) or anti-CD25 (P61) monoclonal antibody (250  $\mu$ g per mouse). Representative density plots showing IFN- $\gamma$ - and IL-

17-producing cells gated in the population of CD45+Gr-1+ neutrophils (A) and IFN- $\gamma$ -, IL-17-producing and FoxP3-expressing cells gated in the population of CD4+T cells (B).

# Supplementary Figure 1

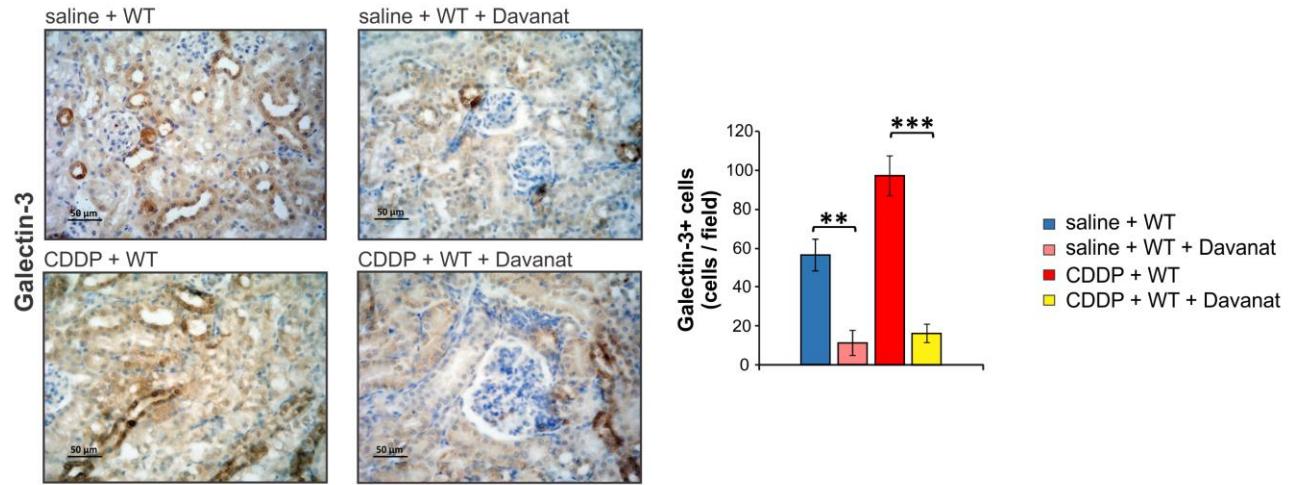

## Supplementary Figure 2

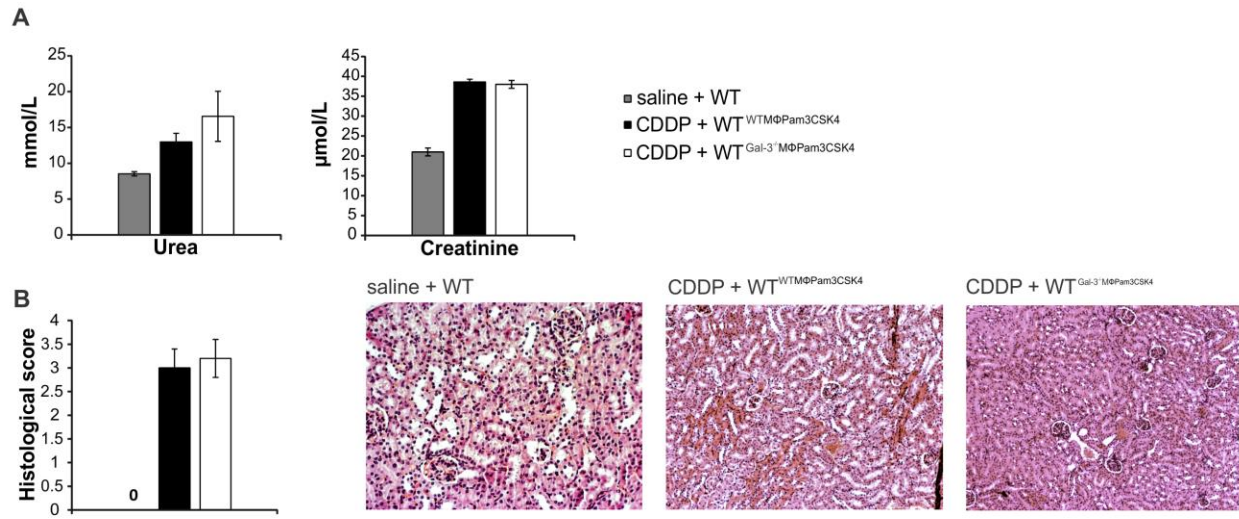

# Supplementary Figure 3

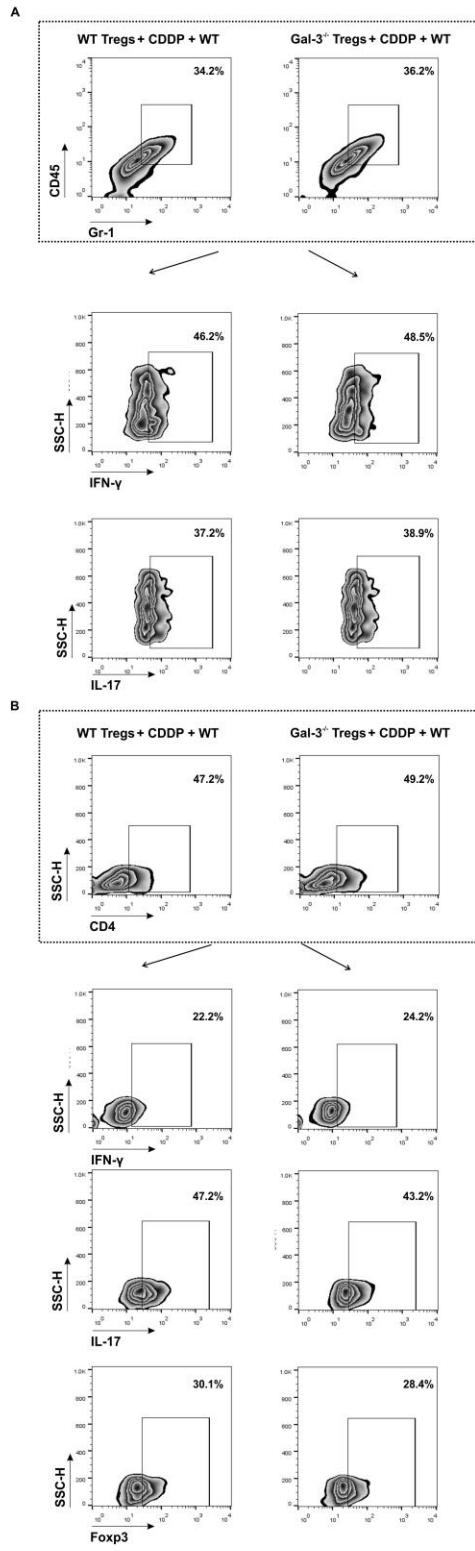



# Supplementary Figure 4

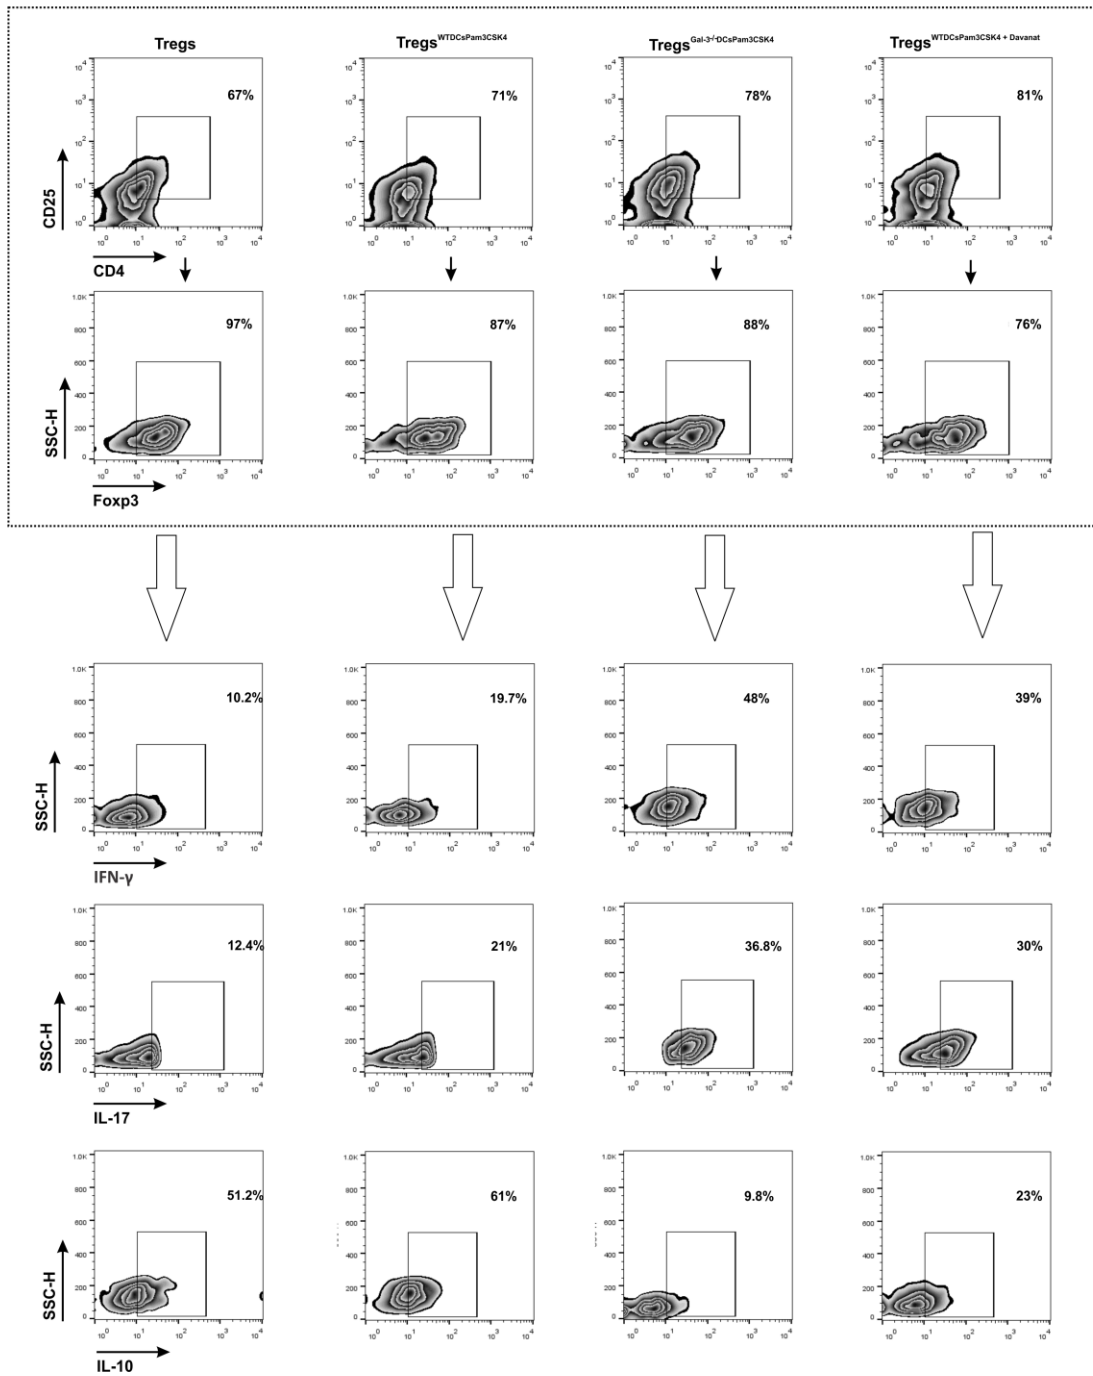

# Supplementary Figure 5

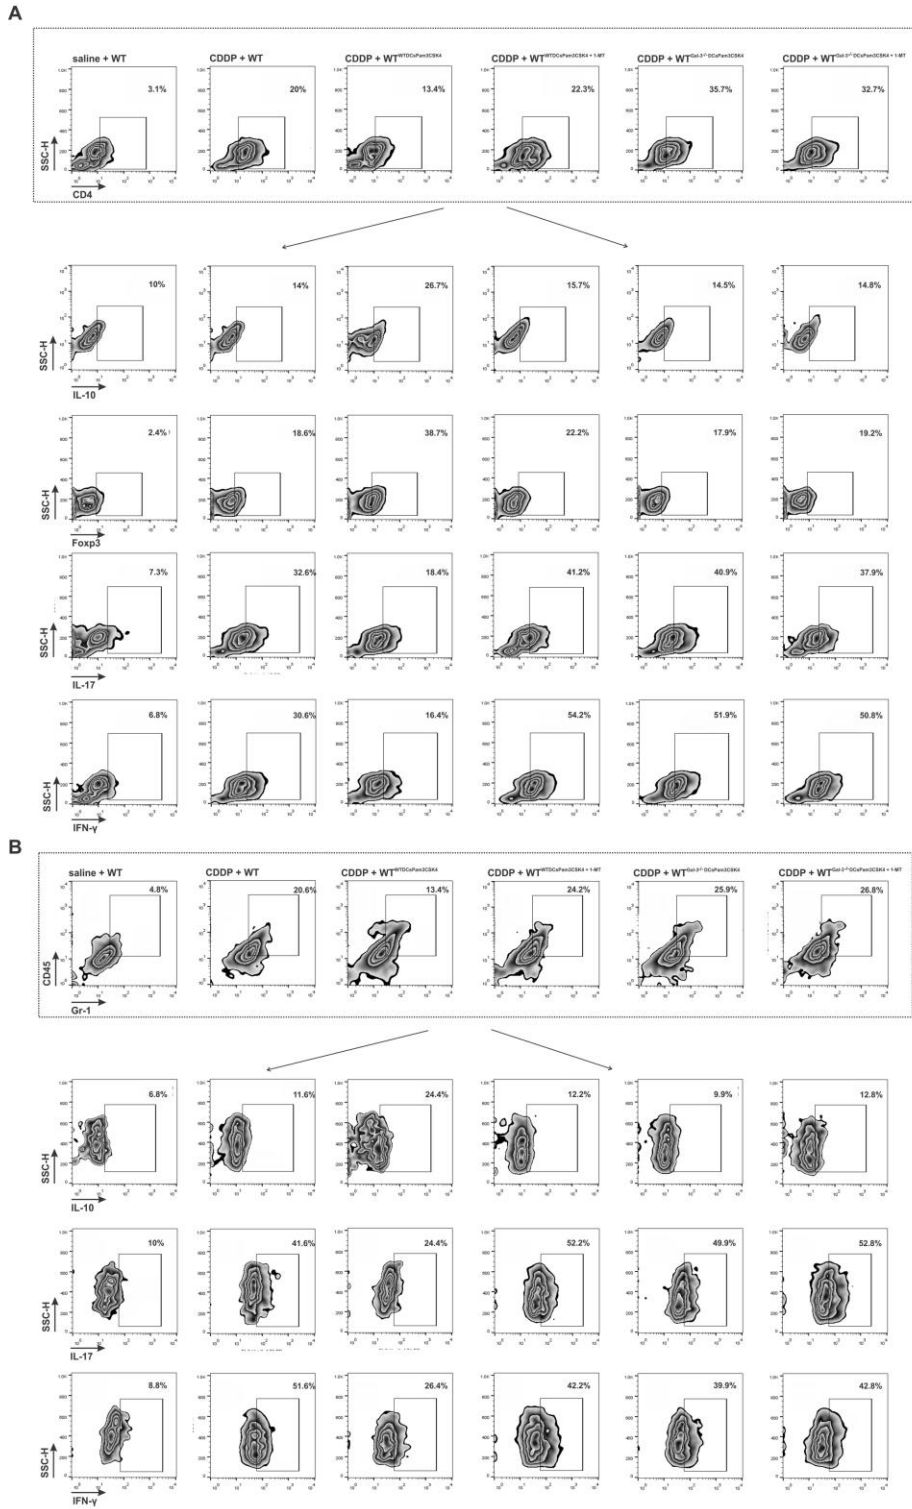

# Supplementary Figure 6

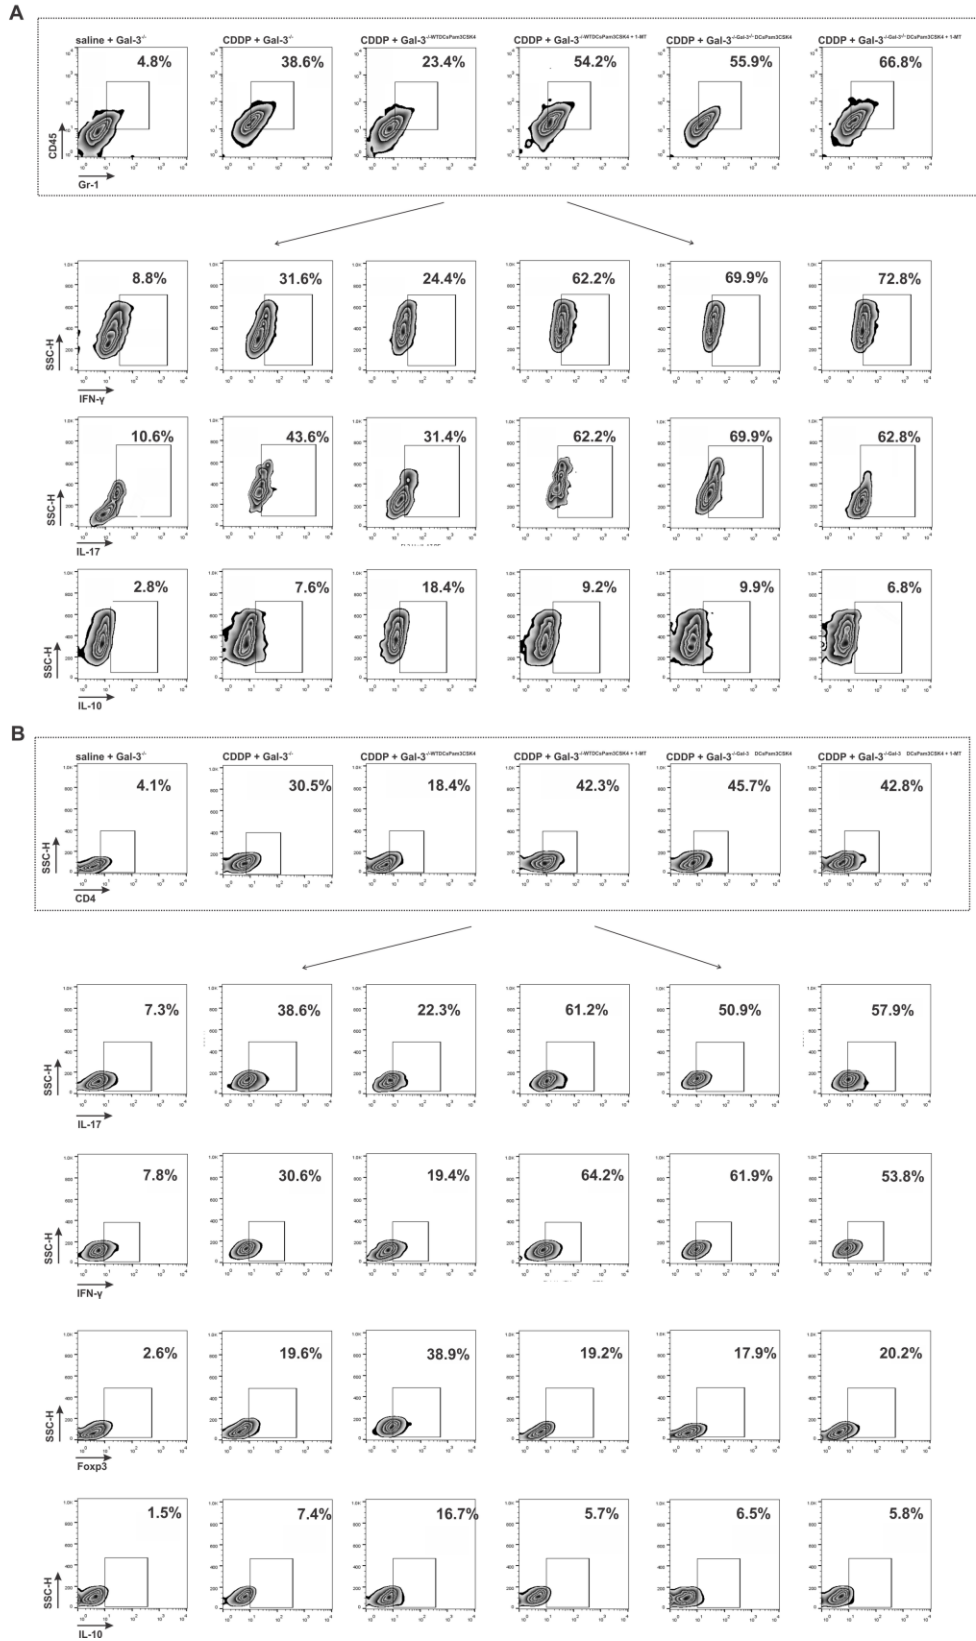

# Supplementary Figure 7

**A**

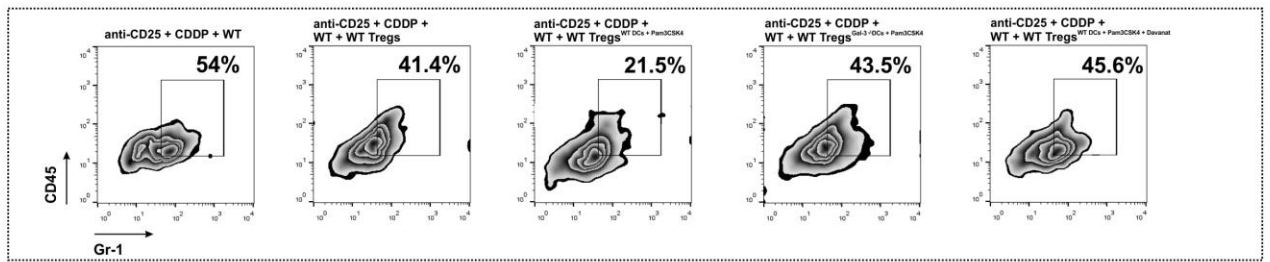

**B**

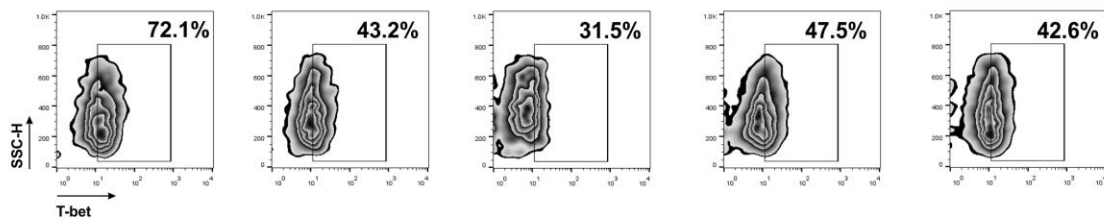

**C**

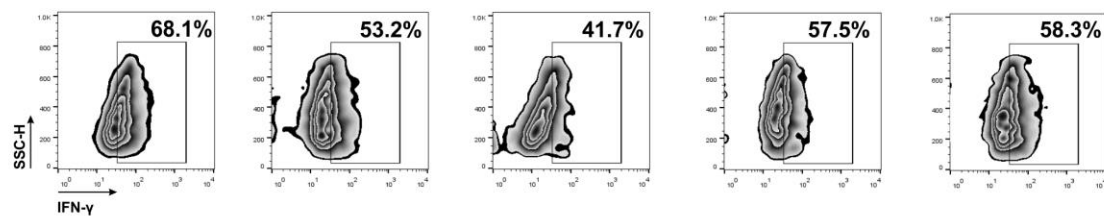

**D**

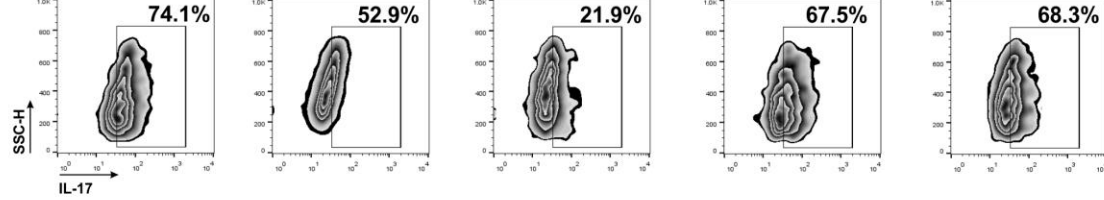

**E**

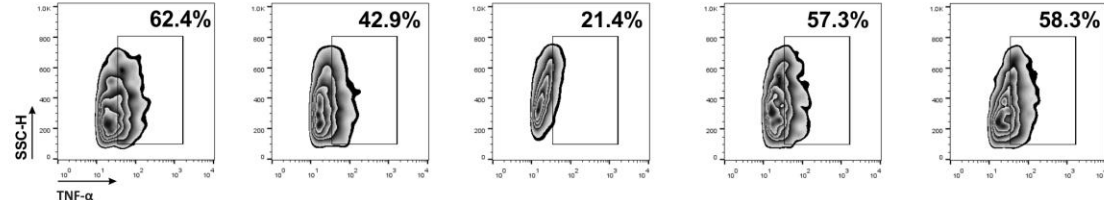

**F**

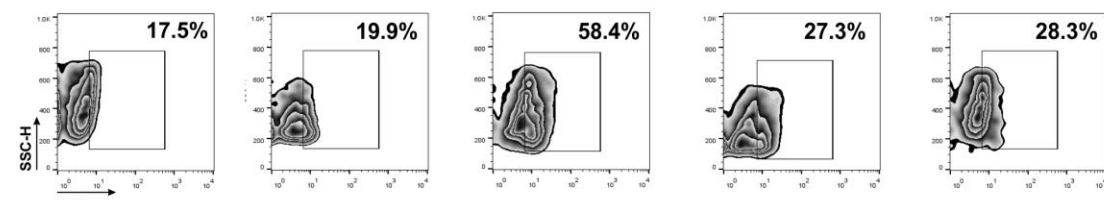

# Supplementary Figure 8

**A**

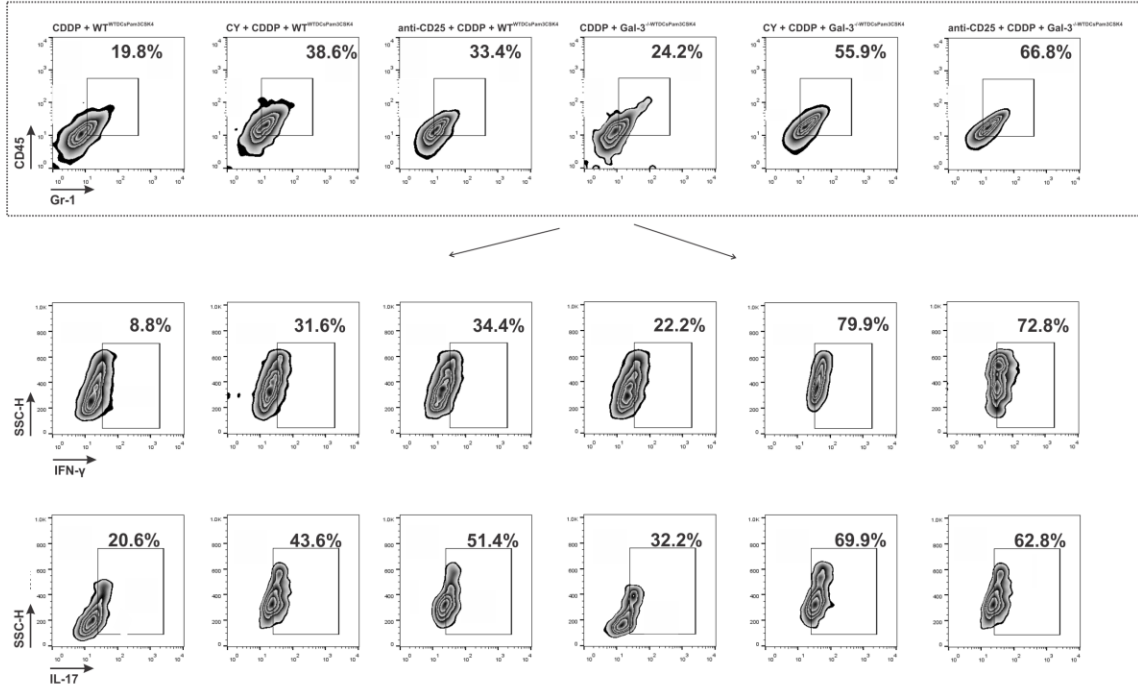

**B**

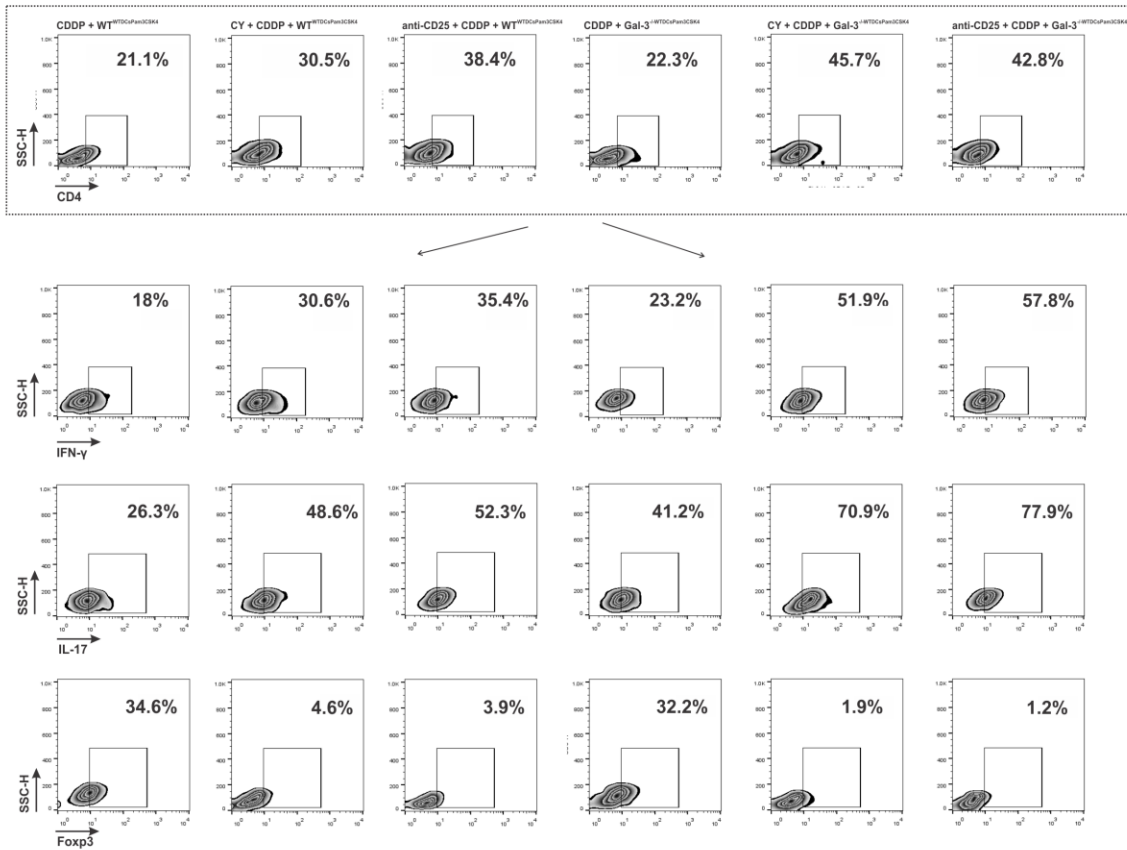

Supplement: thnov09p5976s1.pdf [file thnov09p5976s1.pdf]
